# Supplementary material
Source: Springer Nature journal article supplement (https://www.springermedizin.de/resource/supplementary/13058_2013_3389_MOESM4_ESM.pdf/9704038)
Supplement: MOESM4 [file 9704038]

Assessed for  
eligibility (n=26)

Excluded (n=1)  
(Screen failure)

Treated with  
carboplatin and  
everolimus (n=25)

Did not complete cycle 1 of  
carboplatin-everolimus due to  
withdrawal of consent (n=1);  
rapid progression of disease  
(n=2)

Included in intent to  
treat analysis (n=25)
